# High expression of galectin-7 associates with poor overall survival in patients with non-metastatic clear-cell renal cell carcinoma

Jieti Wang<sup>1,\*</sup>, Yidong Liu<sup>1,\*</sup>, Yuanfeng Yang<sup>2,\*</sup>, Zhiying Xu<sup>1</sup>, Guodong Zhang<sup>1</sup>, Zheng Liu<sup>1</sup>, Hangcheng Fu<sup>1</sup>, Zewei Wang<sup>1</sup>, Haiou Liu<sup>3</sup>, Jiejie Xu<sup>1</sup>

<sup>1</sup>Department of Biochemistry and Molecular Biology, School of Basic Medical Sciences, Fudan University, Shanghai 200032, China

<sup>2</sup>Department of Urology, Zhongshan Hospital, Fudan University, Shanghai 200032, China

<sup>3</sup>Shanghai Key Laboratory of Female Reproductive Endocrine Related Diseases, Hospital of Obstetrics and Gynecology, Fudan University, Shanghai 200011, China

\*These authors contributed equally to this work

**Correspondence to:** Haiou Liu, **email:** liuhaiou@fudan.edu.cn  
Jiejie Xu, **email:** jjxufdu@fudan.edu.cn

**Keywords:** clear-cell renal cell carcinoma, galectin-7, prognosis, nomogram

**Received:** April 09, 2016

**Accepted:** May 23, 2016

**Published:** May 31, 2016

## ABSTRACT

**Background:** Galectin-7, has a controversial role in tumor progression, can either suppress tumor growth or induce chemoresistance depends on different tumor histology types. The aim was to appraise Galectin-7 expression on the overall survival (OS) of patients with non-metastatic clear cell renal cell carcinoma (ccRCC) following surgery.

**Results:** High galectin-7 expression was specifically correlated with necrosis ( $P = 0.015$ ). Multivariate analysis confirmed galectin-7 as an independent prognosticator for OS ( $P = 0.005$ ). High galectin-7 expression suggested poor OS ( $P < 0.001$ ), particularly with UISS intermediate and high score groups. Notably, the predictive accuracy of the traditional prognostic scores was improved when combined with galectin-7 expression.

**Materials and methods:** We retrospectively enrolled 416 patients who underwent nephrectomy at a single institute between 2008 and 2009 and detected their intratumor galectin-7 expression by immunohistochemistry. Kaplan-Meier method was conducted to plot survival curves and multivariate cox regression analysis for potential independent prognostic factors on OS. A nomogram was constructed with concordance index (C-index) and Akaike's Information Criteria (AIC) to appraise prognostic accuracy of different models.

**Conclusions:** High galectin-7 expression is an independent adverse predictor for survival. Evaluation of galectin-7 could help guide postsurgical management for non-metastatic ccRCC patients.

## INTRODUCTION

Renal cell carcinoma, the most prevalent solid tumor of kidney malignancies, represents 2–3% of all human cancers [1]. Clear cell renal cell carcinoma, the commonest histological type of RCCs, has the worst prognosis with an average 5-year survival at 71% [2]. Although the prognostic values of traditional clinic-pathologic factors, such as pathological T, N stages, metastasis, the presence of necrosis, sarcomatoid and LVI, as well as ECOG-PS

have been addressed, their combined impacts on ccRCC prognosis is however scattered [3]. Recently, novel models combining conventional clinic-pathologic factors with molecular biomarkers had been established to provide more precise prediction for overall and recurrence-free survival, aid patient management and treatment [4–6]. Hence, it's promising to seek new molecules to optimize present prognostic systems.

Galectins, a subgroup of the lectin family, known for their ability to bind to N-linked or O-linked glycosylated

$\beta$ -galactoside sugars, universally participate in cancer initiation, progression and metastasis [7]. It's reported that galectins expression changes in carcinoma cells under micro-environmental stress conditions during tumor development [8], thereby can be potentially novel prognosticators and targets [9]. Galectin-7, a homodimer galectin, is implicated in various biological effects including cell proliferation, differentiation, apoptosis, collective cell migration and immune-modulatory [10–13], which plays a completely discrepant role in different types of cancers. On the one hand, galectin-7 was affirmed as a p53 induced protein and may participate in the pro-apoptotic function of p53 [14], thereby suppresses tumor growth [15]. Ueda, S et al. verified it as a tumor suppressor in gastric cancer [16] and Tsai, CJ et al reported elevated galectin-7 expression as a benign predictor in squamous cell carcinoma of the cervix and was associated with better outcomes after radiotherapy [17]. On the other hand, galectin-7 can boost MMP-9 expression and impede p53 expression, thereby promotes tumorigenesis and induces chemoresistance [18–20]. Demers, M. et al. and Labrie, M. et al. reported galectin-7 was associated with cancer metastasis and chemo-resistant in breast and ovarian cancers, respectively [21, 22]. Although all these important roles of galectin-7 in cancers of different histologic types had been identified, there haven't any reports about the relationship between galectin-7 expression and RCC, whether it can promote or suppress tumor progression in RCC remained uncertain and its prognostic power in RCC needed to be declared.

In this study, we evaluated the galectin-7 expression in tumor tissues by immunohistochemistry and analyzed the relationship between galectin-7 expression and overall survival in 416 patients with non-metastasis ccRCC. Furthermore, a nomogram was established to help predict prognosis and guide management for ccRCC patients without metastatic diseases.

## RESULTS

### Galectin-7 expression and clinical characteristics in patients with non-metastasis ccRCC

After applying initial exclusion criteria, the expressions of galectin-7 were assessed in an aggregate of 416 non-metastatic ccRCC samples by immunohistochemistry staining analysis. As the pictures presented, the expression of galectin-7 dominantly presented in cytoplasm and nuclear of tumor cells and the expression level varied in patient specimens (Figure 1). The H-score of galectin-7 ranged from 0 to 208, and according to the “minimum *P* value” measure conducted by X-tile, 416 patients were divided into galectin-7 low group (score, 0–80; *n* = 255) and galectin-7 high group (score, 81–208; *n* = 161).

According to the correlation analyses, higher galectin-7 expression was associated with the presence of necrosis (*P* = 0.015), while other clinic-pathologic variables were presented to have no significant correlation with galectin-7. Furthermore, there was no significant discrepancy between the patients in galectin-7 high and low group regarding UISS score, Leibovich score and SSIGN score (Table 1).

### High expression of galectin-7 is associated with worse overall survival

The median follow-up was 70 months (range, 42–76 months) and 51 (12.3%) patients died during the period. Kaplan-Meier survival analysis revealed that galectin-7 was significantly associated with OS (high vs low; hazard ratio, 95% CI, 2.662, 1.521–4.658; Log-rank test *P* < 0.001) in non-metastasis ccRCC patients and the 5-year overall survival probability in galectin-7 low group is 93.0% while galectin-7 high group has an overall survival probability of 82.1% (Figure 2A).

To further confirm the findings, we divided 416 patients into 3 risk groups according to the UISS score: low risk (score 1; *n* = 191, 45.9%), intermediate risk (score 2; *n* = 198, 47.6%) and high risk (score 3; *n* = 27, 6.5%). Kaplan-Meier survival analyses presented that the remarkable difference between galectin-7 high and low patients was dominantly lay in UISS intermediate and high risk groups (Log-rank *P* = 0.010 and 0.033 respectively; Figure 1B–1D).

### Galectin-7 expression as an independent prognosticator in non-metastasis ccRCC patients

We conducted multivariate Cox regression analysis to apprise the independent prognostic power of galectin-7 and all accessible clinic-pathologic variables (tumor size, pathological T-stage, necrosis, Fuhrman grade, sarcomatoid, LVI and ECOG-PS) in non-metastasis ccRCC. Results indicated that tumor size (*P* < 0.001), pathological T stage (*P* = 0.002), necrosis (*P* = 0.002), Fuhrman grade (*P* = 0.009), sarcomatoid (*P* = 0.010), LVI (*P* = 0.003) and galectin-7 (*P* = 0.003) were independently predictive factors of OS, while ECOG-PS (*P* = 0.280) showed no significance (Figure 3). Furthermore, multivariate Cox regression analysis were conducted in UISS subgroups. Considering the wide variation on UISS high subgroup, we combined UISS intermediate and high subgroups to UISS higher risk subgroup. As the results presented, tumor size, pathological T stage, necrosis, sarcomatoid, LVI and galectin-7 were independently predictive factors of OS, while Fuhrman grade and showed no significance. (Supplementary Figure S1).

Furthermore, we investigated whether the galectin-7 expression signature can help improve the

predictive accuracy of known prognostic models (UISS score, Leibovich score and SSIGN score). As the results presented, cooperating galectin-7 expression signature with these models manifests a larger C-index (0.743 vs 0.779, 0.816 vs 0.829, 0.805 vs 0.822, respectively) and a smaller AIC (556.8 vs 547.7, 512.4 vs 504.1, 512.8 vs 506.2, respectively) than the original ones and have better predictive accuracy (Table 2).

### Establishment and validation of prognostic nomogram for OS

According to preceding analyses, Fuhrman grade 2 can't well different from Fuhrman grade 1 (hazard ratio = 1.080; 95% CI, 0.306–3.851;  $P = 0.898$ ) for predicting OS (Figure 3), hence we combined Fuhrman grade 1 and 2 to single Fuhrman 1 + 2 for further nomogram building-up without compromising the model robustness. All the independent predictive factors were cooperated to establish a prognostic nomogram (Figure 4A). The nomogram illustrated that tumor size contributed largest to the prognostication (weighted ratio = 0.414), while necrosis, LVI as well as galectin-7 showed a minor impact on outcome (weight ratio = 0.079, 0.075, 0.071, respectively). The calibration plots manifested an excellent consistency in bootstrap analysis between the calculated and real observation for 3-year and 6-year OS (Figure 4B–4C).

The comparison among the established nomogram and known predictive models for OS was conducted to assess the predictive power of the new model. It's displayed that the Harrell's C-index for the built-up nomogram to predict OS (0.854) was significantly larger than that of the UISS score (0.743), Leibovich score (0.816) and SSIGN score (0.805), while the AIC was

smaller than these models (474.5 vs 556.8, 512.4 and 512.8, respectively) (Table 2). This superior performance of nomogram manifested it's an excellent predictive models for OS in patients with non-metastasis ccRCC.

### DISCUSSION

Our study first reported the independent prognostic power of galectin-7 for OS in non-metastasis ccRCC patients. Moreover, galectin-7 manifests a better discriminative power in UISS intermediate and high risk subgroups, which can help optimize the traditional score system in guiding management of patients with higher UISS score. The nomogram integrating tumor size, pathological T stage, necrosis, Fuhrman grade, sarcomatoid, LVI and galectin-7 expression shows a better prognostic accuracy in OS than the traditional models, thus has a better effectiveness in non-metastasis ccRCC patients OS prediction.

Consistence with reports in breast, ovarian and oral squamous cell carcinoma [19, 22, 23], elevated galectin-7 expression acted as a reverse predictive factor in non-metastasis ccRCC patients. This finding may result from the function of galectin-7 in enhancing tumor cells aggressiveness and inducing chemo-resistance [19]. However, our study excluded these patients with metastasis ccRCC, yet the expression level of galectin-7 still performed well in predicting overall survival, which revealed galectin-7 may participate in other cellular biochemistry progresses in ccRCC progression and metastasis beyond the known functions. Furthermore, previous study revealed that in normal kidney tissues, galectin-7 can selectively bind to cilia, increase cilia length and promote polarized epithelial repairing [24].

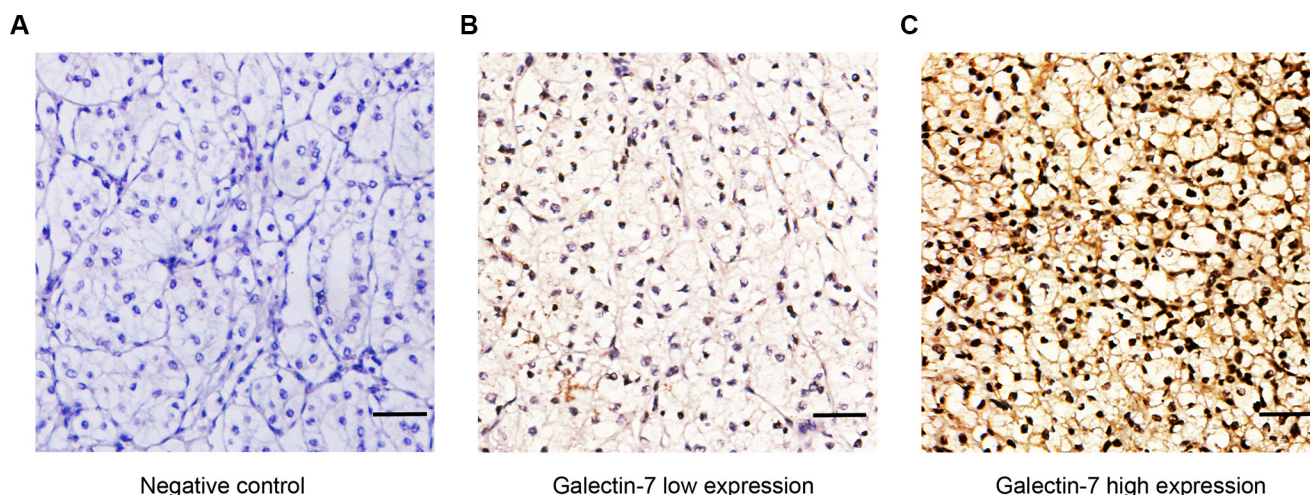

**Figure 1: Representative immunohistochemistry staining pictures of ccRCC tissue sections in galectin-7 expression.** (A) Negative control. (B) Intratumor low galectin-7 expression. (C) Intratumor high galectin-7 expression. Scale bar: 50  $\mu\text{m}$  (original magnification  $\times 200$ ).

**Table 1: Correlations between Galectin-7 expression and clinical characteristics in non-metastasis ccRCC patients**

| Characteristic        | Patients (n = 416) |      | Galectin7 expression |                | P            |
|-----------------------|--------------------|------|----------------------|----------------|--------------|
|                       | No.                | %    | Low (n = 255)        | High (n = 161) |              |
| Age at surgery, years |                    |      |                      |                | 0.790        |
| Mean ± SD             | 55.37 ± 12.15      |      | 54.47 ± 12.20        | 56.79 ± 11.96  |              |
| Gender                |                    |      |                      |                | 0.272        |
| Male                  | 296                | 71.2 | 176                  | 120            |              |
| Female                | 120                | 28.8 | 79                   | 41             |              |
| Tumor size, cm        |                    |      |                      |                | 0.098        |
| Mean ± SD             | 4.23 ± 2.36        |      | 4.18 ± 2.25          | 4.31 ± 2.52    |              |
| Pathological T stage  |                    |      |                      |                | 0.546        |
| T1                    | 294                | 70.7 | 185                  | 109            |              |
| T2                    | 25                 | 6.0  | 15                   | 10             |              |
| T3                    | 97                 | 23.3 | 55                   | 42             |              |
| Necrosis              |                    |      |                      |                | <b>0.015</b> |
| Absent                | 336                | 80.8 | 216                  | 120            |              |
| Present               | 80                 | 19.2 | 39                   | 41             |              |
| Sarcomatoid*          |                    |      |                      |                | 0.438        |
| Absent                | 409                | 98.3 | 252                  | 257            |              |
| Present               | 7                  | 1.7  | 3                    | 4              |              |
| LVI                   |                    |      |                      |                | 0.066        |
| Absent                | 316                | 76.0 | 202                  | 114            |              |
| Present               | 100                | 24.0 | 53                   | 47             |              |
| Fuhrman grade         |                    |      |                      |                | 0.067        |
| 1                     | 78                 | 18.8 | 58                   | 20             |              |
| 2                     | 196                | 47.1 | 112                  | 84             |              |
| 3                     | 95                 | 22.8 | 57                   | 38             |              |
| 4                     | 47                 | 11.3 | 28                   | 19             |              |
| ECOG-PS               |                    |      |                      |                | 0.051        |
| 0                     | 348                | 83.7 | 221                  | 127            |              |
| ≥ 1                   | 68                 | 16.3 | 34                   | 34             |              |
| UISS score            |                    |      |                      |                | 0.434        |
| LR                    | 191                | 45.9 | 122                  | 69             |              |
| IR                    | 198                | 47.6 | 119                  | 79             |              |
| HR                    | 27                 | 6.5  | 14                   | 13             |              |
| Leibovich score       |                    |      |                      |                | 0.230        |
| LR                    | 231                | 55.5 | 149                  | 82             |              |
| IR                    | 148                | 35.6 | 87                   | 61             |              |
| HR                    | 37                 | 8.9  | 19                   | 18             |              |
| SSIGN score           |                    |      |                      |                | 0.079        |
| LR                    | 307                | 73.8 | 198                  | 109            |              |



|    |     |      |    |    |  |
|----|-----|------|----|----|--|
| IR | 101 | 24.3 | 53 | 48 |  |
| HR | 8   | 1.9  | 4  | 4  |  |

LVI = lymphovascular invasion; ECOG PS = Eastern Cooperative Oncology Group performance status; UISS = UCLA Integrated Staging System; SSIGN = Mayo clinic stage, size, grade, and necrosis; LR = low risk; IR = intermediate risk; HR = high risk.

\*Fisher's exact test; chi-square test for all the other categorical variables and students' *t*-test for all continuous variables.

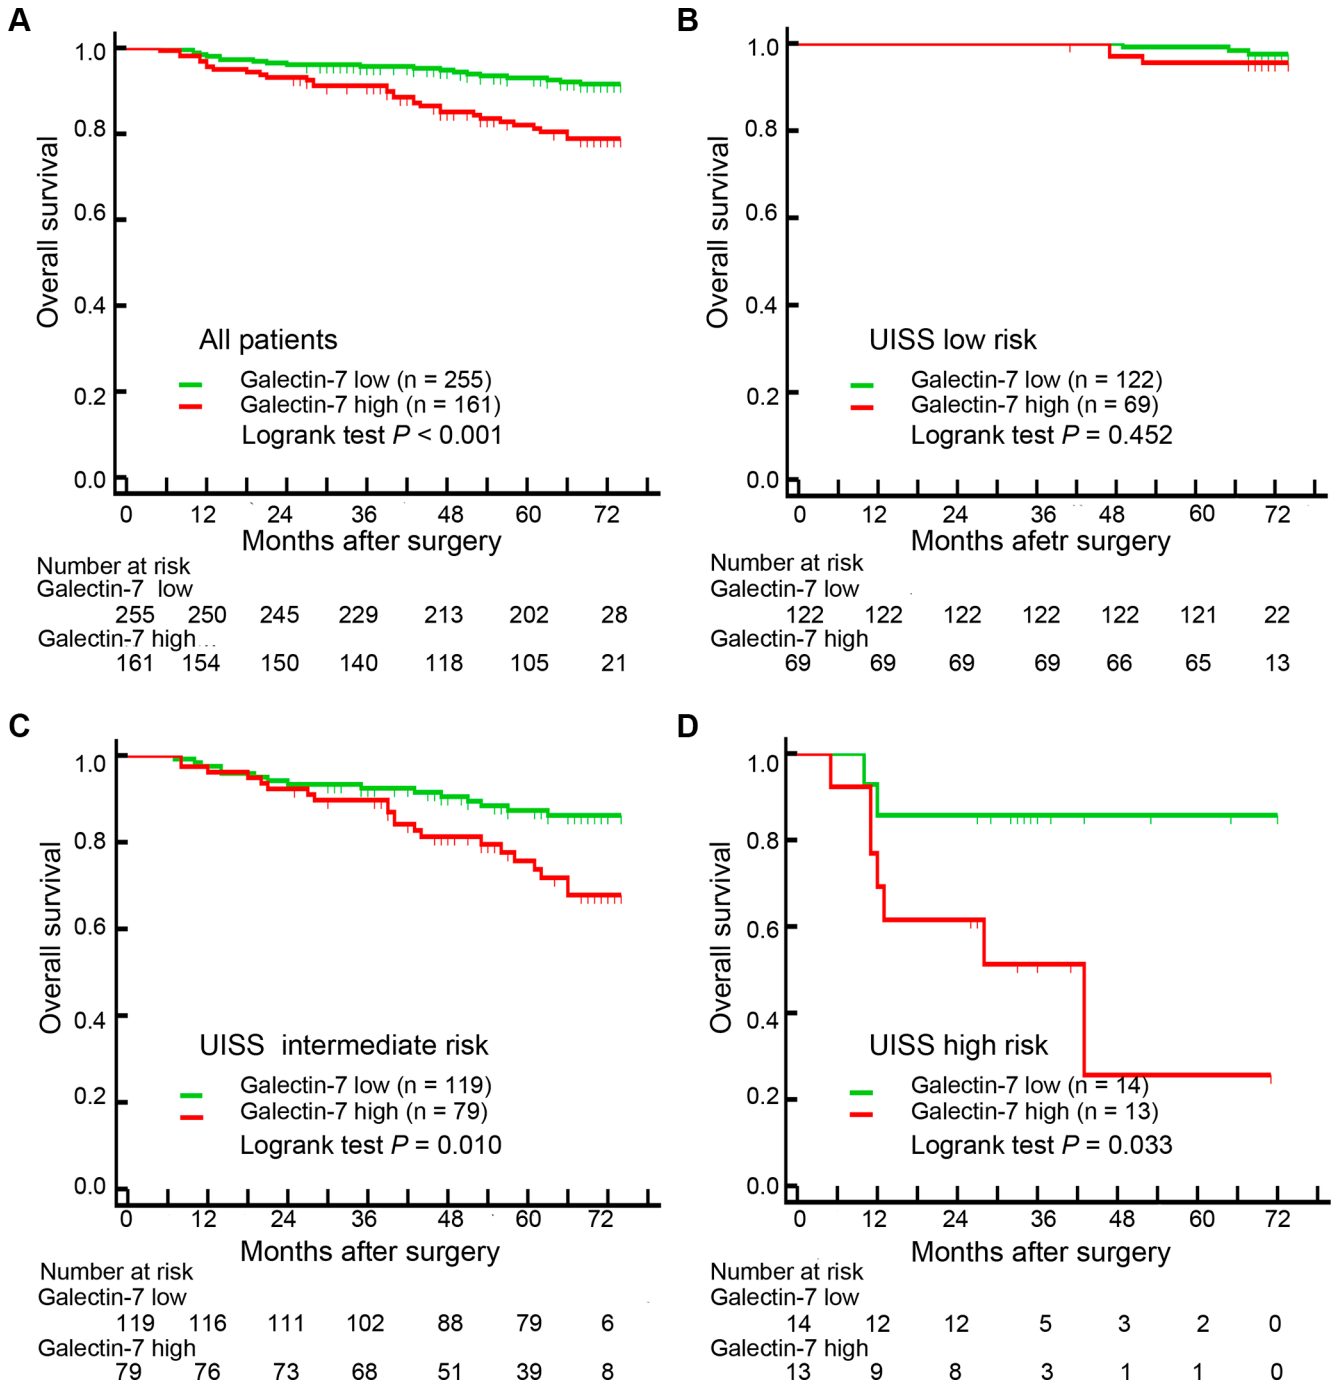

**Figure 2: Prognostic power of galectin-7 in non-metastasis ccRCC patients.** (A) Kaplan-Meier curves of OS based on intratumor galectin-7 expression levels. (B–D) Kaplan-Meier curves of OS based on intratumor galectin-7 expression levels in UISS low risk group, UISS intermediate risk group and UISS high risk group.

However, in cancerous renal tissue, galectin-7 may manifest completely different functions. Take the uterus for examples, galectin-7 up-regulate MMP-9 expression, thereby promotes tumor progression and metastasis in cervical squamous carcinoma [25], while in normal uterus, it promotes uterine repair following menstruation [26]. Our study revealed the correlation of galectin-7 expression and overall survival in non-metastasis ccRCC, which shed a light on the potentially different functions of galectin-7 in ccRCC from normal kidney tissues.

Similar to galectin-1, 3, 8 and 9, high galectin-7 expression acts as an adverse predictor for survival in patients with RCC [27–30]. In RCC, galectin-1 can activate HIF-1 $\alpha$ -mTOR signaling axis, enhance the migration ability of tumor cells, and promote tumor progression [27]. Elevated galectin-3 expression was correlated with higher Fuhrman grade in RCC and predict worse overall survival [28]. Galectin-9 expression was positively associated with tumor size, Fuhrman grade, and necrosis and was an independent prognostic indicator for OS in ccRCC [30]. However, different from galectin-1,3 and 9, high galectin-7 expression is specifically relevant to the present of necrosis in non-metastasis ccRCC, which is similar to the characteristic of galectin-8 in pT1 ccRCC [29]. This specific relevance might derived from the ability of galectin-7 in enhancing the pro-apoptosis function of

p53 and triggering further cell death signaling pathways. Considering the possible function of galectin-7 expression in activating cell necrosis in ccRCC, it may be targeted to decrease necrosis, lower inflammatory burden [31] in ccRCC and improve patients survival.

Despite the clinical significance of galectin-7 in non-metastasis ccRCC has been presented, several constraints of this study require further discussion. First, given the heterogeneous feature of ccRCC and the single hospital sampled population of our study, our result might overestimate the prognostic power of galectin-7. Second, the relative expression level of galectin-7 was cutoff based on the intensity of immunohistochemistry staining, which made the intermediate intensity hard to define. The more quantitative measurement, such as serum test might be more dependable. Third, our study constrain the population in non-metastasis ccRCC, the potential association between galectin-7 and metastasis ccRCC or other RCC needs to be explored.

In conclusion, our study galectin-7 expression in tumor tissue as a potential independent predictive factor for OS in patients with non-metastasis ccRCC. Integrating galectin-7 expression with conventional clinical pathologic factor could establish a novel nomogram which shows a better prognostic accuracy than traditional score systems and helps guiding patients management.

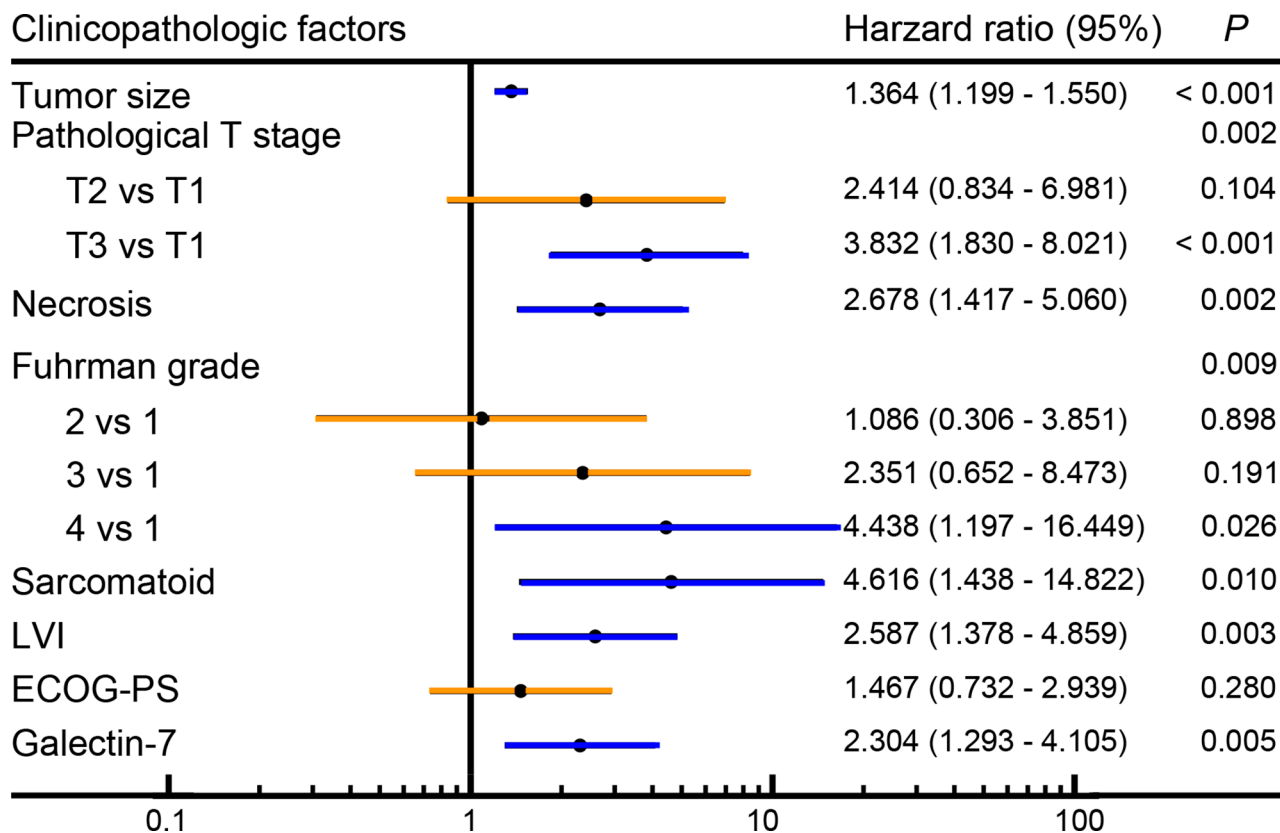

**Figure 3: Multivariate Cox regression analysis of clinic-pathologic factors for overall survival.** Forest plot presented results of multivariate Cox regression analysis of all available prognostic factors (tumor size, pathological T stage, necrosis, sarcomatoid, LVI, ECOG-PS and galectin-7) in patients with non-metastasis ccRCC.

**Table 2: Comparison of the predictive accuracy of the established nomogram with known prognostic models**

| Prognostic models      | C-index* | AIC#  |
|------------------------|----------|-------|
| galectin-7             | 0.619    | 591.0 |
| UISS score             | 0.743    | 556.8 |
| Leibovich score        | 0.816    | 512.4 |
| SSIGN score            | 0.805    | 512.8 |
| UISS + galectin-7      | 0.779    | 547.7 |
| Leibovich + galectin-7 | 0.829    | 504.1 |
| SSIGN + galectin-7     | 0.822    | 506.2 |
| Nomogram               | 0.854    | 474.5 |

\*A larger C-index suggests a better discriminatory power.

#A smaller AIC suggests a better discriminatory power.

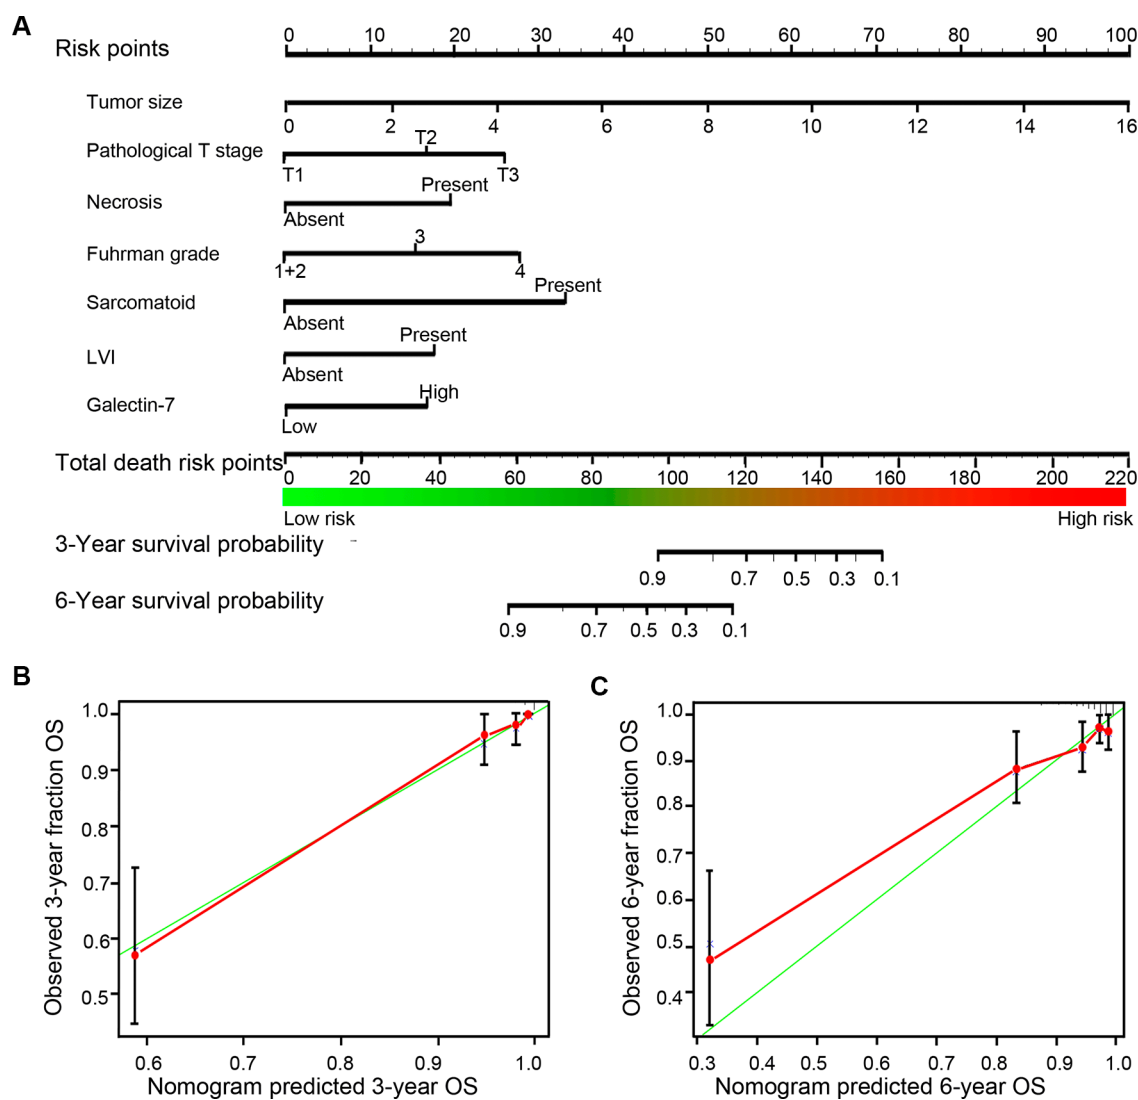

**Figure 4: Nomogram and calibration plots for prognostic prediction of postoperative non-metastasis ccRCC patients.** (A) 6 independent prognostic factors (Size, pathological T stage, necrosis, Fuhrman grade, sarcomatoid and galectin-7) were used to establish the nomogram, predicting death risk of 3-year and 6-year OS. (B-C) Calibration curves for predicting 3-year and 6-year OS of non-metastasis ccRCC patients.

## MATERIALS AND METHODS

### Patients

The database included 416 consecutive patients with non-metastasis ccRCC at Zhongshan Hospital (Shanghai, China) between 2008 and 2009. The original inclusive criteria: (a) confirmed post-operative histopathology diagnosis as clear cell RCC; (b) no radiotherapy or chemotherapy before surgery; (c) with  $N = 0$ ,  $M = 0$  and  $T \neq 4$  based on 2010 AJCC TNM classification [32]. This study was admitted by the hospital's ethics review committee, and informed consents were accessed by phone-call from each patient. The information of clinical characteristics were collected for each patients and the UISS, Leibovich and SSIGN scores were collected according to original scoring protocols [33–35], respectively. Based on these predictive models, all patients were divided into 3 groups: low risk group (LR; UISS = 1, Leibovich = 0–2, SSIGN = 0–2, respectively), intermediate risk group (IR; UISS = 2; Leibovich = 3–5, SSIGN = 3–5, respectively) and high risk group (HR; UISS = 3; Leibovich  $\geq 6$ , SSIGN  $\geq 6$ , respectively).

### Tissue microarray and immunohistochemistry

Primary formalin-fixed, paraffin-embedded tissues were collected from Zhongshan Hospital (Shanghai, China) and tissue microarrays and immunohistochemistry were performed as previously described [36]. As briefly described, all samples were reviewed histologically by hematoxylin and eosin staining, and representative areas were marked on the paraffin blocks away from necrotic and hemorrhagic materials. Duplicate 1.0-mm tissue cores from 2 different areas were used to construct the tissue microarray. Sections from the TMA blocks were cut at 4  $\mu$ m. Anti-galectin-7 antibody (1:100, Abcam, ab108623) was used to perform the immunohistochemistry staining. Immunohistochemistry sections were scanned by an automated microscopy system (Leica DM6000 B, Leica Microsystems GmbH, Mannheim, Germany), images were captured by Leica CV-M2CL camera and sent to 2 pathologists without knowing the patient outcomes to score (H - score) as previously described [36].

### Statistical analysis

X-tile analysis was performed to dichotomize all 416 patients into galectin-7 low and high groups based on the intensity of immunohistochemistry staining. Fisher's exact test, chi-square test and independent samples *t*-test were conducted to appraise the correlation of galectin-7 expression and clinic-pathologic factors as appropriate. Kaplan-Meier method was used to plot survival curves. Multivariate Cox regression analyses was conducted to explore independent predictive factors. The concordance

index (C-index) and Akaike's Information Criteria (AIC) were used to evaluate the predictive power of different models [37]. Statistical analyses were conducted with X-tile 3.6.1 (Yale University, New Haven), MedCalc 11.4.2.0 (MedCalc, Mariakerke), IBM SPSS Statistics v21.0 (IBM Corp, Armonk), R 3.2.3 (R Foundation for Statistical Computing, Vienna) and Stata SE 12.0 (Stata, College Station, TX).

## ACKNOWLEDGMENTS AND FUNDING

This study was funded by grants from National Key Projects for Infectious Diseases of China (2012ZX10002012-007, 2016ZX10002018-008), National Natural Science Foundation of China (31100629, 31270863, 81372755, 31470794, 81401988, 81402082, 81402085, 81471621, 81472227, 81472376, 31570803, 81501999 and 81572352) and Program for New Century Excellent Talents in University (NCET-13-0146). All these study sponsors have no roles in the study design, in the collection, analysis, and interpretation of data.

## CONFLICTS OF INTEREST

The authors declare no conflicts of interest.

### Authors' contributions

J. Wang for acquisition of data, analysis and interpretation of data, statistical analysis and drafting of the manuscript; Y. Liu, Y. Yang, Z. Xu, G. Zhang, Z. Liu, H. Fu and Z. Wang for technical and material support; H. Liu and J. Xu for study concept and design, analysis and interpretation of data, drafting of the manuscript, obtained funding and study supervision. All authors read and approved the final manuscript.

## REFERENCES

1. Ljungberg B, Bensalah K, Canfield S, Dabestani S, Hofmann F, Hora M, Kuczyk MA, Lam T, Marconi L, Merseburger AS, Mulders P, Powles T, Staehler M, et al. EAU guidelines on renal cell carcinoma: 2014 update. *Eur Urol*. 2015; 67:913–924.
2. Keegan KA, Schupp CW, Chamie K, Hellenthal NJ, Evans CP, Koppie TM. Histopathology of surgically treated renal cell carcinoma: survival differences by subtype and stage. *J Urol*. 2012; 188:391–397.
3. Delahunt B, Cheville JC, Martignoni G, Humphrey PA, Magi-Galluzzi C, McKenney J, Egevad L, Algaba F, Moch H, Grignon DJ, Montironi R, Srigley JR. The International Society of Urological Pathology (ISUP) grading system for renal cell carcinoma and other prognostic parameters. *AM J Surg Pathol*. 2013; 37:1490–1504.



4. Kim HL, Halabi S, Li P, Mayhew G, Simko J, Nixon AB, Small EJ, Rini B, Morris MJ, Taplin ME, George D. A Molecular Model for Predicting Overall Survival in Patients with Metastatic Clear Cell Renal Carcinoma: Results from CALGB 90206 (Alliance). *EBioMedicine*. 2015; 2:1814–1820.
5. Rasti A, Mehrazma M, Madjd Z, Keshtkar AA, Roudi R, Babashah S. Diagnostic and prognostic accuracy of miR-21 in renal cell carcinoma: a systematic review protocol. *Bmj Open*. 2016; 6:e9667.
6. Chen F, Zhang Y, Senbabaoglu Y, Ciriello G, Yang L, Reznik E, Shuch B, Micevic G, De Velasco G, Shinbrot E, Noble MS, Lu Y, Covington KR, et al. Multilevel Genomics-Based Taxonomy of Renal Cell Carcinoma. *Cell Rep*. 2016; 14:2476–2489.
7. Ebrahim AH, Alalawi Z, Mirandola L, Rakhshanda R, Dahlbeck S, Nguyen D, Jenkins M, Grizzi F, Cobos E, Figueroa JA, Chiriva-Internati M. Galectins in cancer: carcinogenesis, diagnosis and therapy. *Annals of translational medicine*. 2014; 2.
8. Timoshenko AV. Towards molecular mechanisms regulating the expression of galectins in cancer cells under microenvironmental stress conditions. *Cell Mol Life Sci*. 2015; 72:4327–4340.
9. Vladoiu MC, Labrie M, St-Pierre Y. Intracellular galectins in cancer cells: Potential new targets for therapy [Review]. *Int J Oncol*. 2014; 44:1001–1014.
10. Advedissian T, Dang T, Pichard E, Poirier F, Viguier M, Deshayes F. The role of Galectin-7 in collective cell migration. *Febs J*. 2014; 2811:539.
11. Barkan B, Cox AD, Kloog Y. Ras inhibition boosts galectin-7 at the expense of galectin-1 to sensitize cells to apoptosis. *Oncotarget*. 2013; 4:256–268. doi: 10.18632/oncotarget.844.
12. Chen HL, Chiang PC, Lo CH, Lo YH, Hsu DK, Chen HY, Liu FT. Galectin-7 Regulates Keratinocyte Proliferation and Differentiation through JNK-miR-203-p63 Signaling. *J Invest Dermatol*. 2016; 136:182–191.
13. Yamaguchi T, Hiromasa K, Kabashima-Kubo R, Yoshioka M, Nakamura M. Galectin-7, induced by cis-urocanic acid, ultraviolet B irradiation, down-modulates cytokine production by T lymphocytes. *Exp Dermatol*. 2013; 22:840–842.
14. Saussez S, Kiss R. Galectin-7. *Cell Mol Life Sci*. 2006; 63:686–697.
15. Ueda S, Kuwabara I, Liu FT. Suppression of tumor growth by galectin-7 gene transfer. *Cancer Res*. 2004; 64:5672–5676.
16. Kim SJ, Hwang JA, Ro JY, Lee YS, Chun KH. Galectin-7 is epigenetically-regulated tumor suppressor in gastric cancer. *Oncotarget*. 2013; 4:1461–1471. doi: 10.18632/oncotarget.1219.
17. Tsai CJ, Sulman EP, Eifel PJ, Jhingran A, Allen PK, Deavers MT, Klopp AH. Galectin-7 levels predict radiation response in squamous cell carcinoma of the cervix. *Gynecol Oncol*. 2013; 131:645–649.
18. Campion CG, Labrie M, Lavoie G, St-Pierre Y. Expression of galectin-7 is induced in breast cancer cells by mutant p53. *Plos One*. 2013; 8:e72468.
19. Grosset AA, Labrie M, Gagne D, Vladoiu MC, Gaboury L, Doucet N, St-Pierre Y. Cytosolic galectin-7 impairs p53 functions and induces chemoresistance in breast cancer cells. *BMC Cancer*. 2014; 14:801.
20. Demers M, Magnaldo T, St-Pierre Y. A novel function for galectin-7: promoting tumorigenesis by up-regulating MMP-9 gene expression. *Cancer Res*. 2005; 65:5205–5210.
21. Demers M, Rose AA, Grosset AA, Biron-Pain K, Gaboury L, Siegel PM, St-Pierre Y. Overexpression of galectin-7, a myoepithelial cell marker, enhances spontaneous metastasis of breast cancer cells. *Am J Pathol*. 2010; 176:3023–3031.
22. Labrie M, Vladoiu MC, Grosset AA, Gaboury L, St-Pierre Y. Galectin-7 increases the invasive behavior of ovarian cancer cells and promotes tumor escape. *Cancer Res*. 2014; 74S.
23. Matsukawa S, Morita K, Negishi A, Harada H, Nakajima Y, Shimamoto H, Tomioka H, Tanaka K, Ono M, Yamada T, Omura K. Galectin-7 as a potential predictive marker of chemo- and/or radio-therapy resistance in oral squamous cell carcinoma. *Cancer Medicine*. 2014; 3:349–361.
24. Rondanino C, Poland PA, Kinlough CL, Li H, Rbaibi Y, Myerburg MM, Al-bataineh MM, Kashlan OB, Pastor-Soler NM, Hallows KR, Weisz OA, Apodaca G, Hughey RP. Galectin-7 modulates the length of the primary cilia and wound repair in polarized kidney epithelial cells. *Am J Physiol-Renal*. 2011; 301:F622–F633.
25. Zhu H, Wu TC, Chen WQ, Zhou LJ, Wu Y, Zeng L, Pei HP. Roles of galectin-7 and S100A9 in cervical squamous carcinoma: Clinicopathological and in vitro evidence. *Int J Cancer*. 2013; 132:1051–1059.
26. Evans J, Yap J, Gamage T, Salamonsen L, Dimitriadis E, Menkhorst E. Galectin-7 is important for normal uterine repair following menstruation. *Mol Hum Reprod*. 2014; 20:787–798.
27. White NM, Masui O, Newsted D, Scorilas A, Romaschin AD, Bjarnason GA, Siu KW, Yousef GM. Galectin-1 has potential prognostic significance and is implicated in clear cell renal cell carcinoma progression through the HIF/mTOR signaling axis. *Br J Cancer*. 2014; 110:1250–1259.
28. Dancer JY, Truong LD, Zhai Q, Shen SS. Expression of Galectin-3 in renal neoplasms: a diagnostic, possible prognostic marker. *Arch Pathol Lab Med*. 2010; 134:90–94.
29. Liu Y, Xu L, Zhu Y, Zhang W, Liu W, Liu H, Xu J. Galectin-8 predicts postoperative recurrence of patients with localized T1 clear cell renal cell carcinoma. *Urol Oncol*. 2015; 33:111–112.
30. Fu H, Liu Y, Xu L, Liu W, Fu Q, Liu H, Zhang W, Xu J. Galectin-9 predicts postoperative recurrence and survival of

- patients with clear-cell renal cell carcinoma. *Tumour Biol.* 2015; 36:5791–5799.
31. Wallach D, Kang TB, Dillon CP, Green DR. Programmed necrosis in inflammation: Toward identification of the effector molecules. *Science.* 2016; 352:f2154.
  32. Edge SB, Compton CC. The American Joint Committee on Cancer: the 7th edition of the AJCC cancer staging manual and the future of TNM. *Ann Surg Oncol.* 2010; 17:1471–1474.
  33. Frank I, Blute ML, Cheville JC, Lohse CM, Weaver AL, Zincke H. An outcome prediction model for patients with clear cell renal cell carcinoma treated with radical nephrectomy based on tumor stage, size, grade and necrosis: the SSIGN score. *J Urol.* 2002; 168:2395–2400.
  34. Leibovich BC, Blute ML, Cheville JC, Lohse CM, Frank I, Kwon ED, Weaver AL, Parker AS, Zincke H. Prediction of progression after radical nephrectomy for patients with clear cell renal cell carcinoma: a stratification tool for prospective clinical trials. *Cancer.* 2003; 97:1663–1671.
  35. Zisman A, Pantuck AJ, Wieder J, Chao DH, Dorey F, Said JW, DeKernion JB, Figlin RA, Belldegrun AS. Risk group assessment and clinical outcome algorithm to predict the natural history of patients with surgically resected renal cell carcinoma. *J Clin Oncol.* 2002; 20:4559–4566.
  36. Xu L, Zhu Y, An H, Liu Y, Lin Z, Wang G, Xu J. Clinical significance of tumor-derived IL-1 $\beta$  and IL-18 in localized renal cell carcinoma: Associations with recurrence and survival. *Urologic Oncology.* 2015; 33:68–69.
  37. Kim Y, Kong L. Estimation of C-index for cox proportional hazards model with censored biomarker covariate subject to limits of detection. *J Biopharm Stat.* 2015; 25:459–473.
